# Supplementary material
Source: publisher figshare collection journal article supplement (https://sage.figshare.com/ndownloader/files/22660097)
Supplement: Supplementary file 1 [file 22660097]

Table A1. Alternative Model Specification

|                                                                                                                               |                   |                   |                   |                   |
|-------------------------------------------------------------------------------------------------------------------------------|-------------------|-------------------|-------------------|-------------------|
| Online Cross-cutting Discussion (W <sup>1</sup> )                                                                             | .54***            | .54***            | .54***            | .54***            |
| Age                                                                                                                           | .02               | .02               | .02               | .01               |
| Gender (high: female)                                                                                                         | -.003             | -.01              | -.01              | -.01              |
| Education                                                                                                                     | -.05 <sup>#</sup> | -.05 <sup>#</sup> | -.05 <sup>#</sup> | -.05 <sup>#</sup> |
| Household Income                                                                                                              | .003              | .0001             | .0004             | .002              |
| Political Interest (W <sup>1</sup> )                                                                                          | .02               | .01               | .01               | .02               |
| Political Efficacy (W <sup>1</sup> )                                                                                          | .05 <sup>#</sup>  | .05 <sup>#</sup>  | .05 <sup>#</sup>  | .05 <sup>#</sup>  |
| Offline Cross-cutting Discussion (W <sup>1</sup> )                                                                            | .05               | .02               | .03               | .03               |
| Traditional News Media Use (W <sup>1</sup> )                                                                                  | -.01              | -.01              | -.01              | -.003             |
| Online News Use (W <sup>1</sup> )                                                                                             | .03               | .01               | .01               | .01               |
| W1DiaOp                                                                                                                       | -.03              | -.01              | -.01              | -.02              |
| General Incidental Exposure (W <sup>1</sup> )                                                                                 | .03               | -.03              | -.02              | -.02              |
| Counter-attitudinal Selective Exposure (W <sup>2</sup> )                                                                      | .28***            | .25***            | .25***            | .25***            |
| Pro-attitudinal Selective Exposure (W <sup>1</sup> )                                                                          | -.08*             | -.09*             | -.11**            | -.05              |
| Counter-attitudinal Incidental Exposure (W <sup>2</sup> )                                                                     |                   | .15***            | .15***            | .13***            |
| Pro-attitudinal Selective Exposure (W <sup>1</sup> ) x Counter-attitudinal Incidental Exposure (W <sup>2</sup> )              |                   |                   | .04               | .12**             |
| Counter-attitudinal Incidental Exposure (W <sup>2</sup> ) <sup>2</sup>                                                        |                   |                   |                   | .04               |
| Pro-attitudinal Selective Exposure (W <sup>1</sup> ) x Counter-attitudinal Incidental Exposure (W <sup>2</sup> ) <sup>2</sup> |                   |                   |                   | -.13*             |
| R <sup>2</sup>                                                                                                                | .48               | .49               | .50               | .50               |
| Adjusted R <sup>2</sup>                                                                                                       | .47               | .49               | .49               | .49               |

Note: <sup>#</sup> p<.1; \* p<.05; \*\* p<.01; \*\*\* p<.001

Table A2. Reverse Stepwise Regression for Final Model

|                                                                                                                               | Final Model       | Excluding<br>Media Use<br>Controls | Excluding<br>Political<br>Attitude and<br>Discussion<br>Controls | Excluding All<br>Controls |
|-------------------------------------------------------------------------------------------------------------------------------|-------------------|------------------------------------|------------------------------------------------------------------|---------------------------|
| Online Cross-cutting Discussion (W <sup>1</sup> )                                                                             | .54***            | .55***                             | .56***                                                           | .57***                    |
| Age                                                                                                                           | .01               | -.01                               | .001                                                             |                           |
| Gender (high: female)                                                                                                         | -.01              | -.02                               | -.02                                                             |                           |
| Education                                                                                                                     | -.05 <sup>#</sup> | -.05 <sup>#</sup>                  | -.05 <sup>#</sup>                                                |                           |
| Household Income                                                                                                              | .003              | .01                                | .01                                                              |                           |
| Political Interest (W <sup>1</sup> )                                                                                          | .01               | .05                                |                                                                  |                           |
| Political Efficacy (W <sup>1</sup> )                                                                                          | .05 <sup>#</sup>  | .06*                               |                                                                  |                           |
| Offline Cross-cutting Discussion (W <sup>1</sup> )                                                                            | .02               | .01                                |                                                                  |                           |
| Traditional News Media Use (W <sup>1</sup> )                                                                                  | -.003             |                                    |                                                                  |                           |
| Online News Use (W <sup>1</sup> )                                                                                             | .01               |                                    |                                                                  |                           |
| Counter-attitudinal Selective Exposure (W <sup>2</sup> )                                                                      | .25***            |                                    |                                                                  |                           |
| Pro-attitudinal Selective Exposure (W <sup>1</sup> )                                                                          | -.06              | .04                                | .06                                                              | .06                       |
| Counter-attitudinal Incidental Exposure (W <sup>2</sup> )                                                                     | .13***            | .18***                             | .19***                                                           | .19***                    |
| Pro-attitudinal Selective Exposure (W <sup>1</sup> ) x Counter-attitudinal Incidental Exposure (W <sup>2</sup> )              | .12**             | .16***                             | .14**                                                            | .15**                     |
| Counter-attitudinal Incidental Exposure (W <sup>2</sup> ) <sup>2</sup>                                                        | .04               | .02                                | .01                                                              | .02                       |
| Pro-attitudinal Selective Exposure (W <sup>1</sup> ) x Counter-attitudinal Incidental Exposure (W <sup>2</sup> ) <sup>2</sup> | -.13*             | -.14*                              | -.13*                                                            | -.13*                     |
| R <sup>2</sup> (%)                                                                                                            | 50                | 46                                 | 46                                                               | 45                        |
| Adjusted R <sup>2</sup> (%)                                                                                                   | 49                | 46                                 | 45                                                               | 45                        |

Note: <sup>#</sup> p<.1; \* p<.05; \*\* p<.01; \*\*\* p<.001
